# Supplementary material for: Structure of the Vacuolar H+-ATPase Rotary Motor Reveals New Mechanistic Insights
Source: PubMed Central journal article supplement (PMC4353692; doi:10.1016/j.str.2014.12.016), 2015-03-03

**Structure, Volume 23**

**Supplemental Information**

**Structure of the Vacuolar H<sup>+</sup>-ATPase Rotary**

**Motor Reveals New Mechanistic Insights**

**Shaun Rawson, Clair Phillips, Markus Huss, Felix Tiburcy, Helmut Wiczorek, John Trinick, Michael A. Harrison, and Stephen P. Muench**

**Supplementary Movie 1 (related to Figure 1): cryo-EM analysis of the V-ATPase.** The *M. Sexta* V-ATPase reconstruction with subunits fitted and labelled.

**Supplementary Movie 2 (related to Figure 2): structural comparison between the *A. hiraе* A<sub>1</sub> and *M. Sexta* V<sub>1</sub> domain.** The two structures are morphed starting from the *A. hiraе* structure and finishes with the *M. sexta* structure. Note the straightening of the central axle in the later structure.

**Supplementary Figure 1 (related to Figure 2): analysis of the V-ATPase cryo-EM reconstructions from *M. sexta* and Yeast.** Comparison between the *M. sexta* (grey surface, top row) and yeast (green surface, bottom row) V-ATPase reconstructions. Each catalytic AB domain is shown with the open site clearly seen between stators S1 and S2 in *M. sexta* and S2 and S3 in yeast. Figure S1 is related to Figure 2.

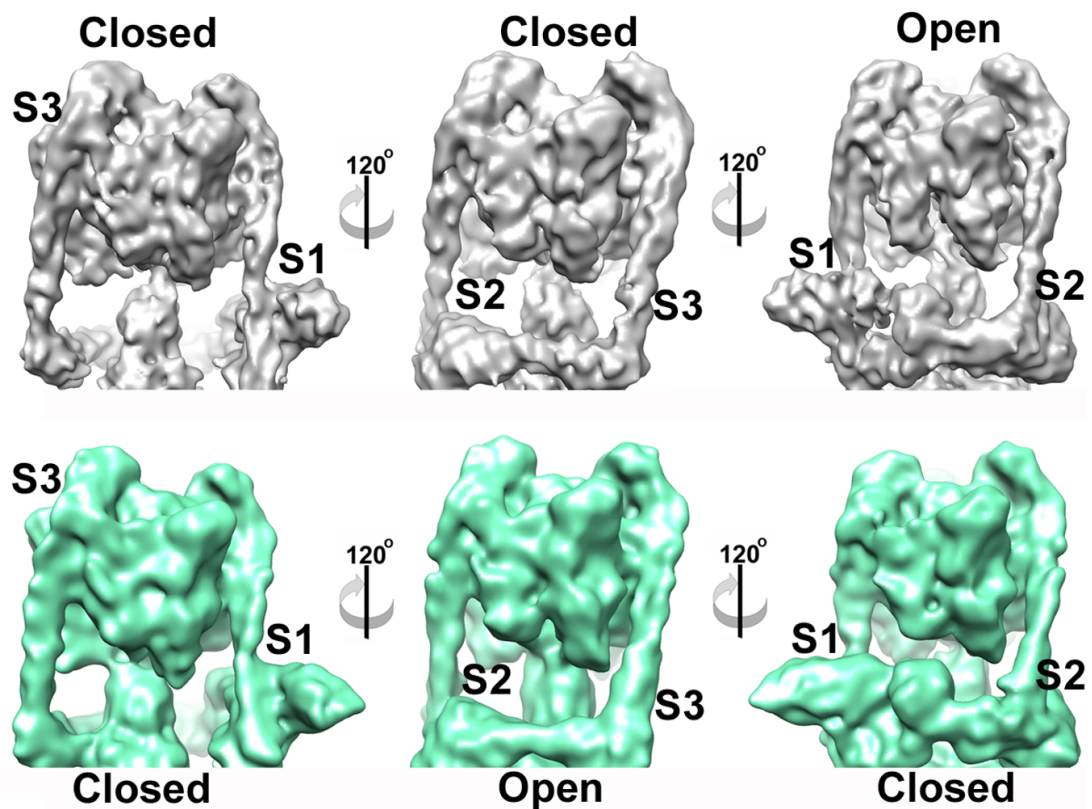

Supplement: mmc1.pdf [file mmc1.pdf]
